# Supplementary material
Source: PubMed Central journal article supplement (PMC3268553)
Supplement: NIHMS338804-supplement-Supplement1.pdf [file NIHMS338804-supplement-Supplement1.pdf]

## Supplementary Appendix

This appendix has been provided by the authors to give readers additional information about their work.

Supplement to: Slamon D, Eiermann W, Robert N, et al. Adjuvant trastuzumab in HER2-positive breast cancer. N Engl J Med 2011;365:1273-83.

(PDF updated October 12, 2011.)

## **SUPPLEMENT: TABLE OF CONTENTS**

**Section 1** - Participating investigators contributing to the BCIRG-006 study listed alphabetically within each country.

**Section 2** – Supplemental text for the cardiac safety methods.

### **Section 3 – Supplemental figures:**

Supplemental Figure 1 – Schematic study design of the BCIRG-006 study.

Supplemental Figure 2 – Kaplan-Meier analysis of the overall survival seen in the BCIRG-006 study.

Supplemental Figures 3a-d - Forest plot analyses of disease-free survival and overall survival for the clinical subgroups stratified for in the BCIRG-006 study.

### **Section 4 – Supplemental table:**

Supplemental Table 1a – Comparison of efficacy events based on nodal status.

Supplemental Table 1b – Comparison of efficacy events based on primary tumor size.

## BCIRG-006 STUDY COLLABORATORS

**CONTRIBUTING INVESTIGATORS:** **Argentina** *G. Cassanello* Hospital Privado de Comunidad; *L. Fein* Centro Oncologico Rosario; *N. Giacomi* Breast Clinica de la mama; *E. Korbenfeld, J. Martinez and M. Justina (prev.)* Hospital Britanico de Buenos Aires; *E. Mickiewicz* Hospital de Oncologia Angel H. Roffo; **Australia** *E. Abdi* Toowoomba Base Hospital; *E. Bayliss* Royal Perth Hospital; *S. Begbie* Port Macquarie Base Hospital; *J. Beith* Sydney Cancer Center; *A. Chan and G. Van Hazel (prev.)* Perth Mount Medical Center; *J. Chirgwin* Box Hill Hospital; *P. Claringbold and A. Davidson (prev.)* Fremantle Hospital; *P. Clingan* Southern Medical Day Care; *P. Craft* The Canberra Hospital; *D. Dalley* St Vincent's Hospital Sydney Ltd; *R. De Boer* Royal Melbourne Hospital; *J. Dewar and Byrne (prev.)* Sir Charles Gairdner Hospital; *V. Ganju* Frankston Hospital; *S. Gauden and I. Bryard (prev.)* W.P. Holman Clinic; *M. Green* Western Hospital; *D. Grimes* The Wesley Clinic; *G. Kannourakis* Ballarat Onc. & Hem.; *B. Koczwara* Flinders Medical Centre; *D. Kotasek* Ashford Cancer Center; *G. Lewis* Prince of Wales Hospital; *M. Links* St George Hospital; *N. Mccarthy* Royal Brisbane & Women's Hospital; *D. Ransom* St John of God Medical Center; *G. Richardson* Cabrini Hospital; *M. Schwarz* The Alfred Hospital; *S. Selva-Nayagan and I. Olver (prev.)* Royal Adelaide Hospital Cancer Center; *J. Stewart* Calvary Mater Hospital; *A. Sullivan* Sidney Cancer Centre; *M. White* Monash Medical Centre; *N. Woodward and E. Walpole* Princess Alexandra Hospital; *R. Young* Royal Hobart Hospital; **Austria** *C. Dittrich* Kaiser Franz Josef Hospital; *P. Sevelda* Hospital Vienna-Lainz; **Belgium** *V. Cocquyt* Universitair Ziekenhuis Gent; *J. Demol* Heilig Hartziekenhuis; *L. Dirix* Medical Institute St Augustinus; *J. Mebis, D. Vanstraelen and M. Jeoren* Virga Jesse Ziekenhuis Hasselt; *D. Verhoeven* AZ Klina; *J. Vermorken* Universitair Ziekenhuis Antwerpen; **Sarajevo Bosnia And Herzegovina** *S. Beslija* Clinical Centre Univ.; **Brazil** *B. Lemos Ferrari* Hospital Luxemburgo; *S. Lago* Irmandade da Santa Casa de Misericordia de Porto Alegre; *S. Moraes Sanches, C de Lima and A. Anelli (prev.)* Hospital do Cancer do Sao Paulo; *G. Schwartzmann* Hospital Das Clinicas de Porto Alegre; **Bulgaria** *K. Timcheva* NSHATO; *V. Tzekova* MHAT Tsaritsa Yoanna - ISUL; **Canada** *M. Dorreen* QEII Health Sciences Center; *J. Dufresne* CHUS Hopital Fleurimont; *P. Klimo* Lion's Gate Hospital; *J. Latreille* Hôpital Charles LeMoine; *P. Lopez* Regional Cancer Program of the Hôpital Régional de Sudbury; *J. Mackey and M. Smylie (prev.)* Cross Cancer Institute; *C. Potvin and J. Cantin (prev.)* CHUM - Hôtel Dieu de Montreal; *L. Provencher* Hôpital de Saint Sacrement; *J. Roy* Hopital du Sacré-Coeur; *S. Sehdev* William Osler Health Center; *J. Wilson* Humber River Regional Hospital; *Zibdawi and J. Mackinnon (prev.)* Southlake Regional Health Centre **Colombia** *L. Rodolpho Gomez* Instituto de Cancerologia; *O. Sanchez* National Cancer Institute; *C. Vargas Baéz* Edificio de Consultorios el Bosque; **Croatia** *M. Grgic* Univ. Hospital Zagreb; *L. Markulin-Grgic* Univ. Hospital Zagreb; *Z. Mrcic-Krmpotic* Univ. Hospital for Tumors; *E. Vrdoljak* Clinical Hospital Centre Split; **Cyprus** *E. Kakouri, C. Papageorgiou and A. Adamou (prev.)* Bank of Cyprus Onc. Centre; **Czech Republic** *L. Petruzelka* General Univ. Hospital; *I. Stefanek and P. Vodvarka (prev.)* Faculty Hospital Ostrava-Poruba; *R. Vyzula* Masaryk Memorial Cancer Institut; **Egypt** *H. Azim* Cairo Univ. Center; *A. El-Khodary* National Cancer Institute; **Estonia** *P. Padrik* Tallinn Cancer Clinic; *V. Valvere* Estonian Cancer Center; **France** *J. Bonnetterre and L. Vanlemmens (prev.)* Centre Oscar Lambert; *C. Bressac* Hôpital St Joseph; *M. Campone and P. Fumoleau (prev.)* Centre Rene Gauducheau Nantes-Atlantique; *E. Carola* CH de Senlis; *P. Colin* Polyclinique de

Courlancy; *P. Dalivoust* Hôpital Ambroise Paré; *J. Dutel* CH- Service Hémato-Oncologie; *J. Ferrero and M. Namer (prev.)* Centre Antoine Lacassagne; *J. Gligorov* Hôpital Tenon; *J. Guastalla* Centre Leon Berard; *D. Jaubert* Clinique Tivoli; *D. Khayat* Groupe hospitalier Pitié-Salpêtrière; *E. Levy* Hôpital Européen Georges Pompidou; *F. Priou* CHD les Oudairies; *H. Roché* Institut Claudius Regaud; *F. Schaeffer* Cabinet d'Oncologie; *X. Tchiknavorian and L. Cals (prev.)* Hôpital Font Prê; *C. Tournigand* Hôpital St. Antoine; *B. Valenza* Centre Hospitalier; *J. Vannetzel and A. Emmanuel (prev.)* Clinique Hartmann; **Germany** *J. Barinoff and A. Du Bois (prev.)* Dr. Horst Schmidt Kliniken; *K. Baumann and C. Jackis (prev.)*; *D. Behringer* Augusta-Krankenanstalt; *G.P. Breitbach* Städt Klinikum Neunkirchen; *K. Brunnert* Klinikum Osnabrück GmbH; *O. Camara and H. Noshel (prev.)* Universitat Frauenklinik Jena; *B. Christensen* Ruppiner Kliniken; *M. Clemens* Klinikum Mutterhaus der Borromäerinnen gGmbH; *B. Conrad* Elisabethkrankenhaus; *W. Eiermann* RotKreuzKlinikum München; *J. Feltz-Süßenbach* Klinikum Schaumburg; *K. Fritz and W. Prell (prev.)* St. Salvator-Krankenhaus-Frauenklinik; *D. Hempel* Cancer Center Rehling; *S. Henschen* Johanniter Krankenhaus; *C. Herbstreit* Brustzentrum Am Urban; *U. Herwig and M. Carstensen (prev.)* Albertinen-Krankenhaus; *J. Hilfrich* Henriettenstiftung; *W. Jonat* Kiel Universitat-Frauenklinik; *E. Keil and G. Morack (prev.)* Helios-Kliniken Berlin Buch; *E. Kettner* Klinikum Magdeburg gGmbH; *L. Kiesel* Westfälische Wilhelms-Universität; *P. Klare* Praxisklinik; *J. Kotsch and K. Lürmann (prev.)* Klinik for Gynecology and obstetrics; *A. Kretzschmar* Robert-Rössle-Klinik im Helios Klinikum Berlin-Buch; *P. Kristen and S. Kunz (prev.)* Klinikum am Steinenberg; *U. Kullmer* Asklepios Kliniken Lich GmbH; *J. Kurzeja and R. Souchon (prev.)* Strahlenklinik des Allgemeines Krankenhauses; *W. Lichtenegger* Charité Berlin; *W. Meinerz* St. Vinzenz Krankenhaus; *T. Müller and Zippel (prev.)* Klinikum Stadt Hanau; *C. Nestle-Krämling and P. Dall (prev.)* Universitätsklinikum Düsseldorf, Frauenklinik; *T. Reimer and B. Gerber (prev.)* Universität Rostock - Women's Hospital; *A. Scharl* Klinikum St. Marien Amberg; *W. Schmidt* Univ. of Saarlandes; *A. Schneeweiss and J. Bastert (prev.)* Universitätsklinikum Frauenklinik Heidelberg; *K. Schweppe* Frauenklinik Ammerland; *I. Schwedler and G. Von Minckwitz (prev.)* Zentrum für Frauenheilkunde und Geburtshilfe; *H. Tessen* Kreiskrankenhaus Goslar; *O. Tome and M.G. Meerpohl (prev.)* St. Vincentius Krankenhaus; *W. Wiest* St. Vincenz u. Elisabeth Hospital; *K. Winzer* Universitätsklinikum Charité; *H. Wolf* Krankenhaus Leonberg; *M. Zedelius* Ev. Diakonissenkrankenhaus; **Greece** *V. Georgoulis* Univ. Hospital of Heraklion; **Hong Kong** *A. Kwong and L. Chow (prev.)* Queen Mary Hospital, Tung Wah Hospital; **Hungary** *K. Boer and M. Baki (prev.)* Szent Janos Korhaz Onkologia; *M. Dank* Semmelweis Egyetem Clinic of Radiology and Onc.; *T. Pinter* Petz Aladar Megyei Oktato Korhaz Onkoradiologia; *M. Szanto* DEOEC Onkologiai Tanszek; **India** *S. Advani* Jaslok Hospital and Research Centre; *D. Doval* Rajiv Gandhi Cancer Institute & Research centre; *S. Gupta* Jessa Ram Hospital; *P. Julka* All India institute of medical sciences; *A. Ranade* Deenanath Mangeshkar Hospital & Research centre; **Ireland** *J. Crown* St. Vincent's Univ. Hospital; *L. Grogan* Beaumont Hospital; *B. Bird, F. Janku and J. Hilfrich (prev.)* Bon Secours Hospital; *M. Keane* Univ. College Hospital Galway; *J. Kennedy* St. James's Hospital; *J. Mc Caffrey* Institute for Cancer Research; *S. O'Reilly and O. Breathnach (prev.)* Cork Univ. Hospital; **Israel** *F. Barak* Barzilai Medical Center; *N. Efrat* Kaplan Medical Center; *G. Fried and H. Goldberg (prev.)* Onc. Institute Rambam Medical Center; *D. Geffen* Soroka Medical Center; *R. Isacson* Onc. Institute Shaare-Zedek Medical Center; *B. Kaufman* Sheba Medical Center; *S. Rizel* Rabin Medical Center, Beilinson Campus; *T. Safra* Sourasky (Ichilov) Medical Center; *M. Steiner* The Lady Davis Carmel Medical Center; **Italy** *C. Barone* Universita Catolica Sacro Cuore; *A. Bonetti* Mater Salutis Hospital; *T. Gamucci*

Presidio Ospedaliero; *G. Gasparini* Ospedale S. Filippo Neri; *R. Iaffaioli* IRCCS - Istituto Nazionale per lo Studio e la Cura dei Tumori; *M. Marangolo* Ospedale S. Maria delle Croci; *C. Massacesi* Ospedale Umberto I; *L. Mosciatti* Ospedale Belcolle Polo Ospedaliero Centrale; *M. Nardi* Ospedali Riuniti di Reggio Calabria; *A. Panetta and M. L. Geminiani (prev.)* Osp. Bentivoglio-Azienda USL Bologna Nord; *A. Ravaoli* Ospedale "Infermi"; **Lebanon** *D. Abi Gerges* Rizk Hospital; *G. Y Chahine* Notre Dame des Secours Hospital; *M. Ghosn* Hotel Dieu de France; *N. Saghir* American Univ. of Beirut Medical center; **Mexico** *C. Chan* Hospital de Especialidades - Wellington Hospital; *A. Silva* Hospital de Oncologia; *A. Valle* Centro Nacional 20 de Noviembre; **New Zealand** *V. Harvey* Auckland Hospital; *R. Isaacs* Regional Cancer Treatment Service; *M. Jameson* Waikato Hospital; **Poland** *A. Czerepinska* Ziemia Lubelska Onc. Center; *H. Karnicka-Mlodkowska* Centrum Medyczen Sopmed; *T. Pienkowski* Warsaw Breast Cancer Clinic; *J. Rolski and M. Pawlicki (prev.)* Maria Sklodowska-Curie Memorial Cancer Institute; *M. Wojtukiewicz* Regional Onc. Center; *J. Zaluski* Wielkolskie Onc. Center; **Romania** *F. Badulescu* Clinical County Hospital nr. 1; *N. Ghilezan* Institute of Onc. "Prof. Dr I. Chiricuta" Cluj; *L. Roman* County Hospital Brasov; *D. Stanculeanu and N. Gutulescu (prev.)* Institute of Onc. "Al. Trestioreanu" Bucharest; **Russian Federation** *A. Garin* State Institution "Russian Oncological Research Center n.a. N.N. Blokhin of RAMS"; *V. Gorbunova* N.N. Blokchin Cancer Research Center; *V. Semiglazov* Federal State Institution "Research Institute of Onc. n.a. N.N. Petrov Rosmedtechnology"; **Slovak Republic** *I. Koza and S. Korec (prev.)* Národný onkologický ústav Slovakia; *S. Spanik* Onkologický ústav sv. Alžbety Slovakia; **Slovenia** *E. Matos and T. Cufar (prev.)* Institute of Onc. Ljubljana; *I. Takac* Univ. Clinical Centre Maribor; **South Africa** *E. Beltchev* Pretoria Academic Hospital - Univ. of Pretoria; *R. De Bruyne* Hopelands Cancer Centre; *K. Maart and C.R. Jacobs(prev.)* East Cape Onc. Center; *S. Moodley* Donald Gordon Medical Centre; *R. Pienaar* Panorama Medi-Clinic; *B. Rapoport* The Medical Onc. Centre of Rosebank; *C. Slabber* Mary Potter Onc. Center; **South Korea** *J. Ahn and M-W. Kim (prev.)* Asan Medical Center; *Y. Bang* Seoul National Univ. Hospital; *J. Choi and L. Ho-Yeong (prev.)* Ajou Univ. Medical Center; *Y. Im* Samsung Medical Center; *J. Sil Ro* National Cancer Center; **Spain-GEICAM** *E. Adrover* Cebrian Hospital General de Alicante; *E. Alba Conejo* Hospital Clínico Virgen de la Victoria; *S. Albiol Rodríguez* Hospital Espiritu Santo; *J. Ales Martinez* Hospital Ruber International; *J. Alonso Romero* H.U. Virgen de la Arrixaca; *I. Alvarez Lopez* Hospital Donostia; *E. Aranda* Hospital Universitario Reina Sofia; *A. Arcusa Lanza* Consorci Sanitari de Terrassa; *J. Baena Canada* Hospital Puerta del Mar; *L. Calvo Martinez* Complejo Hospitalario Universitario A Coruna; *C. Crespo Massieu* Hospital Ramon Y Cajal - HRC Oncologia; *S. Dominguez* Hospital Txagorritxu; *J. Florian Gerico* Hospital Comarcal de Barbastro; *C. Jara Sanchez* Fundacion Hospitalaria de Alcorcon; *F. Lobo* Fundacion Jimenez Diaz; *M. Margeli Vila* Hospital Germans Trias I Pujol; *M. Martin* Hospital Universitario San Carlos; *J. Mel Lorenzo* Hospital Xera Calde; *A. Oltra Ferrando* Hospital Virgen de los Lirios; *A. Pelegri* Hospital Universitario Sant Joan de Reus; **Sweden** *T. Fornander* Karolinska Univ. Hospital; **Switzerland** *M. Apro* Clinique de Genolier; **Taiwan, ROC** *T. Chao* Tri-Service General Hospital; *M.C. Liu Sun-Yat-Sen* Cancer Center; **Tunisia** *M. Frikha* Hospital Habib Bourguiba; *A. Mezlini* Institut Salah Azaiez; **Turkey** *A. Aydiner* Ýstanbul Univ. Faculty of Medicine; *Y. Ozisik and Esmen Baltali (prev.)* Hacettepe Univ. Institute of Onc.; **United Kingdom** *S. Chan and J. Carmichael (prev.)* Nottingham City Hospital; *L. Sherwin* Ipswich Hospital; *A. Wardley* Christie Hospital NHS Trust; **Uruguay** *G. Krygier* Hospital de Clínicas "Dr. Manuel Quintela"; *R. Rodriguez Lemes* Hospital Central de las Fuerzas Armadas; **USA** *Y. Abubakr* Integrated Community Onc. Network FL; *M. Adler* San Diego Cancer Center CA; *R.*

*Ansari* Michiana Hem.-Onc, IN; *F. Arena* Arena Onc. Assoc. NY; *C. Beall* Morgantown Internal Medicine Group WV; *J. Beattie and T. Pluard (prev.)* Missouri Cancer Care, MO; *D. Berdeaux* Sletten Cancer Institute MT; *A. Bianco* Progressive Care, SC; *A. Brufsky* UPMC Cancer Centers / Magee Womens Hospital PA; *S. Boniol and L. Campbell (prev.)* , Christus Schumpert health Systeme , LA H.; *Burriss* Sarah Cannon Cancer Center TN; *Robert R. Carroll*, P.A., PA; *A. Chakrabarti* Hope Center IN; *S. Chitneni* Hem./Onc. Association of the Quad Cities IA; *L. Chap*, Monterey Center, CA; *N. Chowhan* Cancer Care Center IN; *P. Cobb* Hem./ Onc. Centers or the Northern Rockies MT; *M. Diaz-Lacayo and A. Hussein (prev.)* Aventura Comprehensive Cancer Research Group of Florida; *P. Dreisbach* Desert Hem.- Onc. Medical Group CA; *J. Fain and R. Kerr (prev.)* South West Regional Cancer Center TX; *C. Falkson* Univ. of Alabama Birmingham AL; *M. Fesen* Hutchinson Clinic KS; *S. Gluck and S.C. Tang (prev.)* Sylvester Cancer Center FL; *A. Gonzalez* Cancer Specialists of SouthnTexas, P.A.; *J. Goodman* Providence Cancer Institute Office MI; *D. Greenwald* Medical Onc. Assoc. PA; *J. Hajdenberg* Pasco Pinellas Cancer Center FL; *S. Hoffman* Altoona Hospital, Blair Medical Assoc.PA; *F. Holmes* Texas Onc., PA; *S. Hurvitz* UCLA Medical Group / Pasadena Onc.CA; *H. Jhangiani* Compassionate Cancer Care Medical Group, CA; *M. Jones*, PC, TN; *G. Justice* Pacific Coast Hem-Onc Medical Group CA; *J. Juturi* Texas Cancer Assoc.TX; *L. Kalman* Onc. and Hem. Group of South Florida; *P. Kennedy* Wilshire Onc. Medical Group CA; *W. Kincaid* McLeod Center and Blood Center TN; *L. Klein* Northwest Medical Specialists, PC IL; *K. Koneru* Cancer Care of Southern Indiana; *M. Lange* Grand Rapids Clinical Onc. Program MI; *L. Laufman* Hem. Onc. Consultants OH; *R. Lemon* Cancer & Blood Institute of the Desert CA; *S. Limentani* Carolinas Hem. - Onc. Assoc. NC; *J. Link and C. Forsthoff (prev.)* Breast Link Medical Group inc. CA; *E. Lower* Univ. of Cincinatti OH; *S. Malamud* Beth Israel Medical Center NY; *P. Mcandrew* Tower Hem. Onc. CA; *R. Mccroskey* Rainier Onc.WA; *E.A. Mckeen* Palm Beach Cancer Institute FL; *R. Mena* Providence Saint Joseph Medical Center CA; *K. Mills* Wyoming Medial Center WY; *M. Modiano* Arizona Onc. Assoc.AR; *T. Moore* ZangMeister CenterOH; *R. Moroose* Florida Hospital Cancer Institute FL; *R. Moss* Robert A. Moss,PA, CA; *B. Nair* Little Rock Hem. Onc. Assoc. AR; *J. Neel* Melbourne International Medicine Assoc.FL; *O. Olopade* Univ. of Chicago Medical Center IL; *R. Orłowski* Northwestern Carolina Onc. & Hem., NC; *R. Page* The Center for Cancer and Blood Disorders TX; *D. Patel* Aurora Bay Care Medical Center GA; *A. Patton* Hem. -Onc. Assoc.FL; *A. Perez* Memorial Regional Cancer Center FL; *C. Perkins* California Onc. of the Central Valley CA; *P. Petruska* Dividion St Louis, MO; *J. Philip* Hem. Onc. Assoc. of Illinois IL; *J. Polikoff* Kaiser Permanente San Diego CA; *J. Posada* and R. R Young (prev.) Scott & white Clinic & Hospital TX; *Z. Rahman* Center TX; *R. Rangineni* St. Joseph Onc., Inc. MO; *E. Reich* Jupiter Medical Center FL; *R. Reiling and R. Foulke (prev.)* Presbyterian Hospital Center for Cancer Research NC; *D. Rinaldi* Louisiana Onc. Assoc.LA; *N.Robert* US Oncology TX; *P. Robertson and D. Osborn (prev.)* Western Washington Onc.WA; *G. Rodriguez* South Texas Onc. - Hem. TX; *P. Rubin* Moses Cone Regional Cancer Center NC; *C. Russell* University of Southern California; *M. Saleh* Georgia Cancer Specialists GA; *M. Savin* Texas Cancer Center at Medical City TX; *M. Schleider* Drs. Forte, Schleider, Attas and Condemi, PA, NJ; *L. Schwartzberg* The West Clinic TN; *D. Shaffer* Suburban Hem.-Onc.GA; *T. Shiftan* Sharp HealthCare Oncology Research Program, CA.; *P. Silverman and B. Overmoyer (prev.)* CWRU Hospitals of Cleveland OH; *D. Slamon* UCLA Medical Center CA; *J. Smith* Northwest Cancer Specialists, WA; *A. Solky and L. Boros (prev.)* Interlakes Hem. Onc. NY; *J. Sparano* Montefiore Medical Center NY; *L. Sylvester* Integrated Community Onc. Network FL; *G. Tansino* Medical Onc. and Hem., CT; *S. Tchekmedyian* Pacific Shores Medical Group CA; *H.*

*Tezcan* North Idaho Cancer Center ID; *N. Ulrich* Texoma Cancer Center TX; *V. Valero* MD Anderson Cancer Center TX; *R. Vargas-Cuba and L. Campbell (prev.)* Christus Schumpert Health System LA; *C. Vaughn* Southfield Onc. Institute MI; *C. Vogel* Lynn Regional Cancer Center FL; *S. Waintraub* Northern New Jersey Cancer Assoc. NJ; *J. Wallmark* Assoc. in Onc./Hem. MD; *A. Wierman and N. Torotoglou (prev.)* Nevada Cancer Center NV; *F. Yunus* Univ. of Tennessee Cancer Institute TN; *K. Yost* St. Mary's Health Services Grand Rapids MI; *H. Zaren* Cook County Hospital IL; **Venezuela** *C. De Jongh* Clinica El Avila; *R. Vera Gimón* Instituto Medico la Floresta

## **SUPPLEMENTAL TEXT**

For patients randomized to the AC→TH arm, guidelines for initiating trastuzumab therapy following the initial four cycles of AC and before trastuzumab were predefined in the protocol. These trastuzumab “pre-start” guidelines were based on a subject’s asymptomatic decline of LVEF (absolute decrease from baseline) and/or the degree of decrease below the calibrated lower limit of normal (LLN) for LVEF determined by the treating institution. Those patients who had either a decrease of  $\geq 15$  points from baseline and below the LLN or who experienced a decline that was  $\geq 16$  points from baseline regardless of the LLN, for two consecutive echo/MUGA determinations performed two weeks apart were not started on trastuzumab.



# SUPPLEMENTAL FIGURES

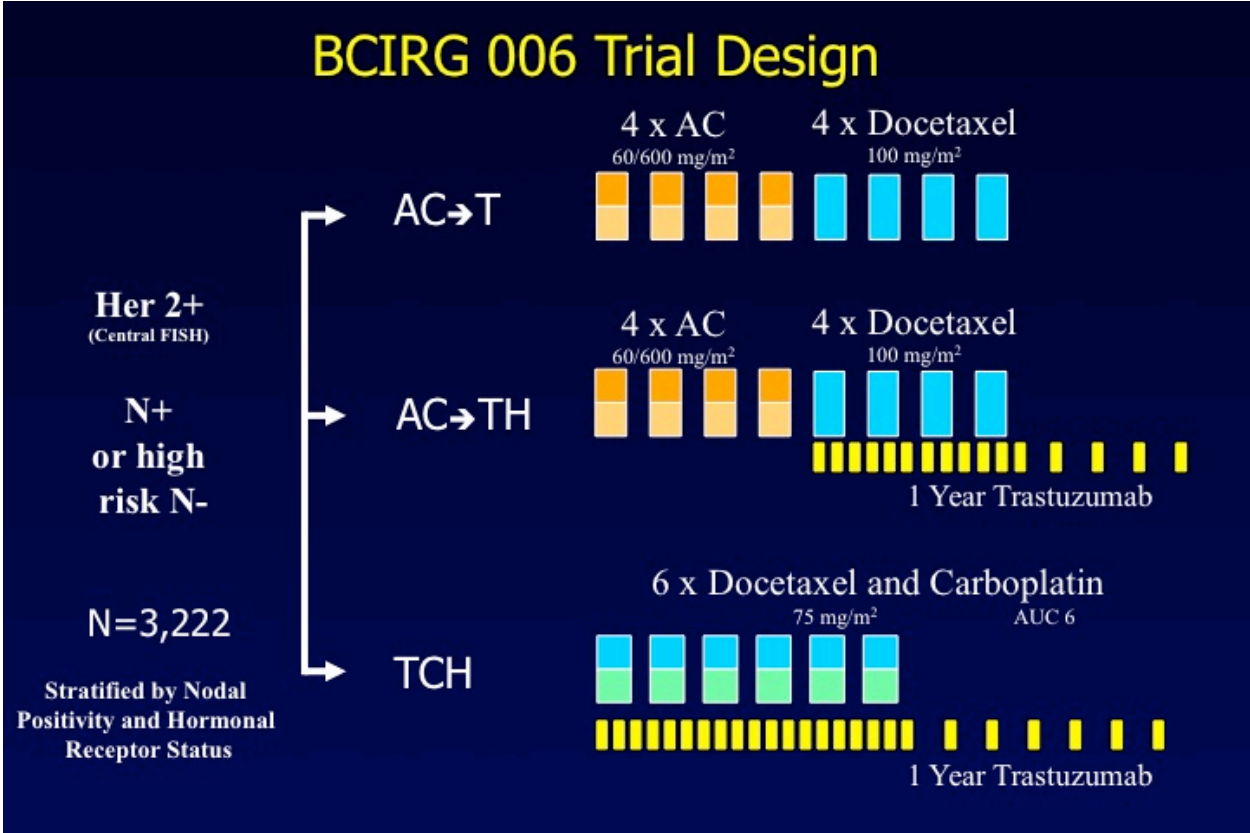

**Supplemental Figure 1** - Study design of the BCIRG-006 trial. A= anthracycline, T=docetaxel, C=cyclophosphamide in the AC→T and AC→TH arms. C=carboplatin in the TCH arm. H=trastuzumab in the two experimental arms.

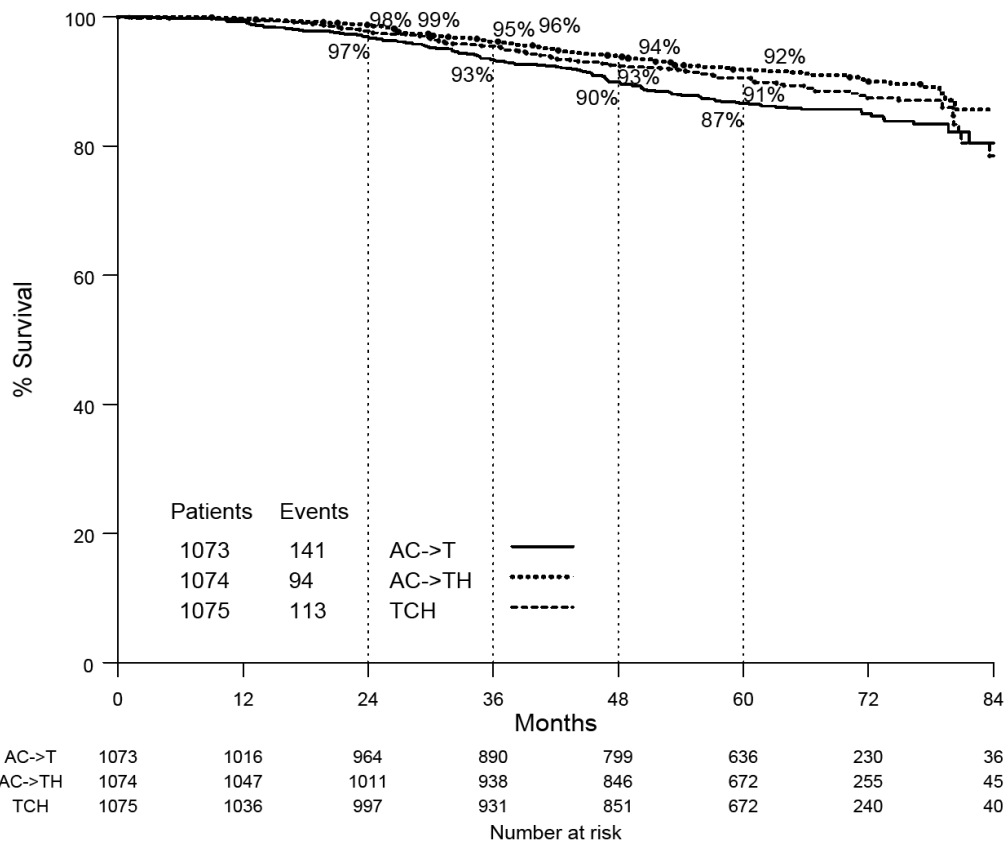

**Supplemental Figure 2** – Kaplan-Meier analysis of the relative overall survival of the three treatment arms.

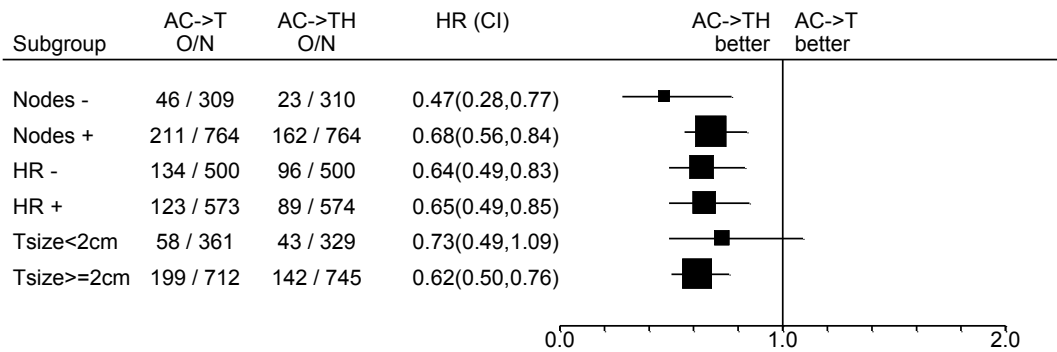

**Supplemental Figure 3a** – Forest plot of disease free survival for BCIRG-006 patients, AC-TH versus AC-T, stratified by nodal status (node negative or node positive), hormone receptor status (HR+ or HR-) and tumor size (<2cm or ≥2cm).

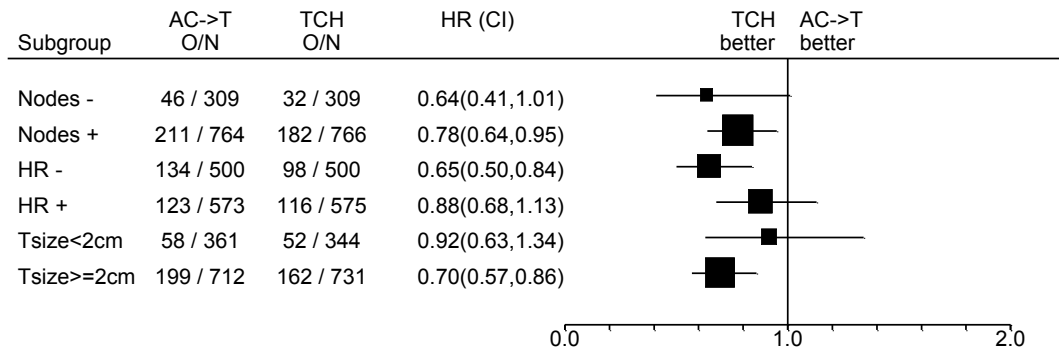

**Supplemental Figure 3b** – Forest plot of disease free survival for BCIRG-006 patients, TCH versus AC-T, stratified by nodal status (node negative or node positive), hormone receptor status (HR+ or HR-) and tumor size (<2cm or ≥2cm).





**SUPPLEMENT Table 1A**

**Analysis of Disease-Free Survival (DFS) by Nodal Status at Randomization**

| <b>Node-Negative Disease</b> |                   |                     |                      |                |                       |
|------------------------------|-------------------|---------------------|----------------------|----------------|-----------------------|
|                              | <b># patients</b> | <b># DFS events</b> | <b>HR ( 95% C.I)</b> | <b>p value</b> | <b>5-year DFS (%)</b> |
| <b>AC→ T</b>                 | 309               | 46                  | 1 (ref)              |                | 85                    |
| <b>AC→ TH</b>                | 310               | 23                  | 0.47 (0.28-0.77)     | 0.0028         | 93                    |
| <b>TCH</b>                   | 309               | 32                  | 0.64 (0.41-1.01)     | 0.057          | 90                    |
| <b>Node-Positive Disease</b> |                   |                     |                      |                |                       |
|                              | <b># patients</b> | <b># DFS events</b> | <b>HR ( 95% C.I)</b> | <b>p value</b> | <b>5-year DFS (%)</b> |
| <b>AC→ T</b>                 | 764               | 211                 | 1 (ref)              |                | 71                    |
| <b>AC→ TH</b>                | 764               | 162                 | 0.68 (0.56-0.84)     | 0.0003         | 80                    |
| <b>TCH</b>                   | 766               | 182                 | 0.78 (0.64-0.95)     | 0.013          | 78                    |
| <b>≥4 Positive Nodes</b>     |                   |                     |                      |                |                       |
|                              | <b># patients</b> | <b># DFS events</b> | <b>HR ( 95% C.I)</b> | <b>p value</b> | <b>5-year DFS (%)</b> |
| <b>AC→ T</b>                 | 350               | 133                 | 1 (ref)              |                | 61                    |
| <b>AC →TH</b>                | 350               | 99                  | 0.66 (0.51-0.86)     | 0.0017         | 73                    |
| <b>TCH</b>                   | 352               | 101                 | 0.66 (0.51-0.86)     | 0.0016         | 72                    |

**SUPPLEMENT Table 1B****Analysis of Disease-Free Survival (DFS) by Tumor Size at Randomization**

| <b>Size &lt; 1 cm</b>       |                   |                     |                       |                |                       |
|-----------------------------|-------------------|---------------------|-----------------------|----------------|-----------------------|
|                             | <b># patients</b> | <b># DFS Events</b> | <b>HR ( 95% C.I)</b>  | <b>p value</b> | <b>5-year DFS (%)</b> |
| <b>AC→T</b>                 | 58                | 16                  | 1 (ref)               |                | 72                    |
| <b>AC→TH</b>                | 46                | 6                   | 0.36 (0.14-0.93)      | 0.034          | 86                    |
| <b>TCH</b>                  | 44                | 6                   | 0.45 (0.17-1.16)      | 0.096          | 86                    |
| <b>Size ≥1 and &lt;2 cm</b> |                   |                     |                       |                |                       |
|                             | <b># patients</b> | <b># DFS events</b> | <b>HR ( 95% C.I)</b>  | <b>p value</b> | <b>5-year DFS (%)</b> |
| <b>AC→T</b>                 | 303               | 42                  | 1 (ref)               |                | 86                    |
| <b>AC→TH</b>                | 283               | 37                  | 0.88 (0.57-1.38)      | 0.59           | 87                    |
| <b>TCH</b>                  | 300               | 46                  | 1.11 (0.73-1.69)      | 0.64           | 86                    |
| <b>Size ≥ 2 cm</b>          |                   |                     |                       |                |                       |
|                             | <b># patients</b> | <b># DFS events</b> | <b>HR ( 95% C.I.)</b> | <b>p value</b> | <b>5-year DFS (%)</b> |
| <b>AC→T</b>                 | 712               | 199                 | 1 (ref)               |                | 71                    |
| <b>AC→TH</b>                | 745               | 142                 | 0.62 (0.50-0.76)      | <0.0001        | 82                    |
| <b>TCH</b>                  | 731               | 162                 | 0.70 (0.57-0.87)      | 0.0009         | 79                    |
